# Supplementary material
Source: PubMed Central journal article supplement (PMC9434804)
Supplement: NIHMS1830557-supplement-Supplemental_Material.pdf [file NIHMS1830557-supplement-Supplemental_Material.pdf]

Dose of Psychotherapy and Long-Term Recovery Outcomes:  
An Examination of Attendance Patterns in Alcohol Use Disorder Treatment

**Supplemental Tables and Figures**

Supplemental Table 1.

*Fit Statistics of Classes Derived from Repeated Measures Latent Class Analyses*

| 12 Sessions of Cognitive-Behavioral Therapy ( <i>n</i> = 301) |                |            |             |                    |             |                     |              |                           |                            |
|---------------------------------------------------------------|----------------|------------|-------------|--------------------|-------------|---------------------|--------------|---------------------------|----------------------------|
| Latent Classes                                                | Log-likelihood | Parameters | BIC         | Differences in BIC | aBIC        | Differences in aBIC | Entropy      | BLRT                      | <i>n</i> of smallest class |
| 1                                                             | -2027          | 12         | 4122        | -                  | 4084        | -                   | 1.0          | -                         | 301                        |
| 2                                                             | -1200          | 25         | 2543        | 1579               | 2464        | 1620                | 0.968        | <i>p</i> < .001           | 110                        |
| 3                                                             | -1023          | 38         | 2263        | 280                | 2142        | 322                 | 0.968        | <i>p</i> < .001           | 65                         |
| 4                                                             | -976           | 51         | 2242        | 21                 | 2081        | 61                  | 0.942        | <i>p</i> < .001           | 48                         |
| <b>5</b>                                                      | <b>-940</b>    | <b>64</b>  | <b>2246</b> | <b>-4</b>          | <b>2043</b> | <b>38</b>           | <b>0.923</b> | <b><i>p</i> &lt; .001</b> | <b>36</b>                  |
| 6                                                             | -930           | 77         | 2298        | -52                | 2054        | -11                 | 0.940        | <i>p</i> = .02            | 20                         |

  

| 12 Sessions of Twelve-Step Facilitation ( <i>n</i> = 335) |                |            |             |                    |             |                     |              |                           |                            |
|-----------------------------------------------------------|----------------|------------|-------------|--------------------|-------------|---------------------|--------------|---------------------------|----------------------------|
| Latent Classes                                            | Log-likelihood | Parameters | BIC         | Differences in BIC | aBIC        | Differences in aBIC | Entropy      | BLRT                      | <i>n</i> of smallest class |
| 1                                                         | -2356          | 12         | 4782        | -                  | 4744        | -                   | 1.0          | -                         | 335                        |
| 2                                                         | -1375          | 25         | 2895        | 1887               | 2816        | 1928                | 0.990        | <i>p</i> < .001           | 129                        |
| 3                                                         | -1176          | 38         | 2573        | 322                | 2453        | 363                 | 0.967        | <i>p</i> < .001           | 82                         |
| 4                                                         | -1119          | 51         | 2535        | 38                 | 2373        | 80                  | 0.956        | <i>p</i> < .001           | 59                         |
| <b>5</b>                                                  | <b>-1089</b>   | <b>64</b>  | <b>2551</b> | <b>-16</b>         | <b>2348</b> | <b>25</b>           | <b>0.944</b> | <b><i>p</i> &lt; .001</b> | <b>45</b>                  |
| 6                                                         | -1066          | 77         | 2580        | -29                | 2336        | 12                  | 0.956        | <i>p</i> = .17            | 2                          |

  

| 4 Sessions of Motivational Enhancement Therapy ( <i>n</i> = 316) |                |            |             |                    |             |                     |             |                           |                            |
|------------------------------------------------------------------|----------------|------------|-------------|--------------------|-------------|---------------------|-------------|---------------------------|----------------------------|
| Latent Classes                                                   | Log-likelihood | Parameters | BIC         | Differences in BIC | aBIC        | Differences in aBIC | Entropy     | LRT                       | <i>n</i> of smallest class |
| 1                                                                | -635           | 4          | 1293        | -                  | 1280        | -                   | 1.00        | -                         | 316                        |
| 2                                                                | -496           | 9          | 1043        | 250                | 1015        | 265                 | 0.937       | <i>p</i> < .001           | 69                         |
| <b>3</b>                                                         | <b>-482</b>    | <b>14</b>  | <b>1045</b> | <b>-2</b>          | <b>1001</b> | <b>14</b>           | <b>1.00</b> | <b><i>p</i> &lt; .001</b> | <b>40</b>                  |
| 4                                                                | -481           | 19         | 1072        | -27                | 1011        | -10                 | 0.627       | <i>p</i> = .54            | 26                         |

*Notes.* BIC = Bayesian information criterion; aBIC = sample size-adjusted BIC; BLRT = bootstrapped Lo–Mendell–Rubin likelihood ratio test

The rows with bold text indicate the classes selected as the optimal solutions.

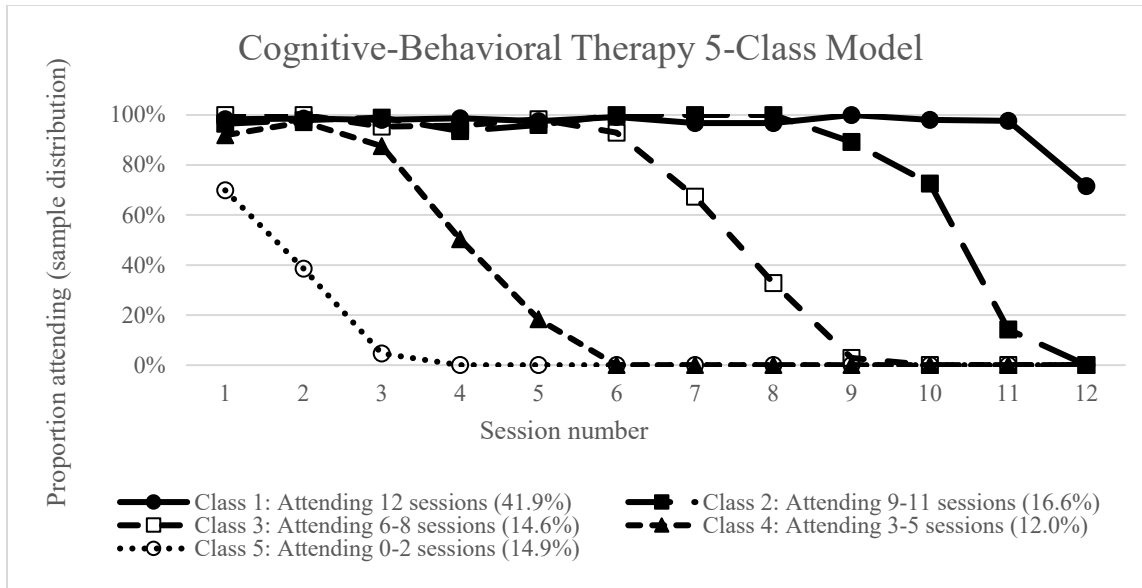

Supplemental Figure 1.

*Model Retained as the Optimal Solution from Latent Class Analyses of Attendance in Cognitive-Behavioral Therapy*

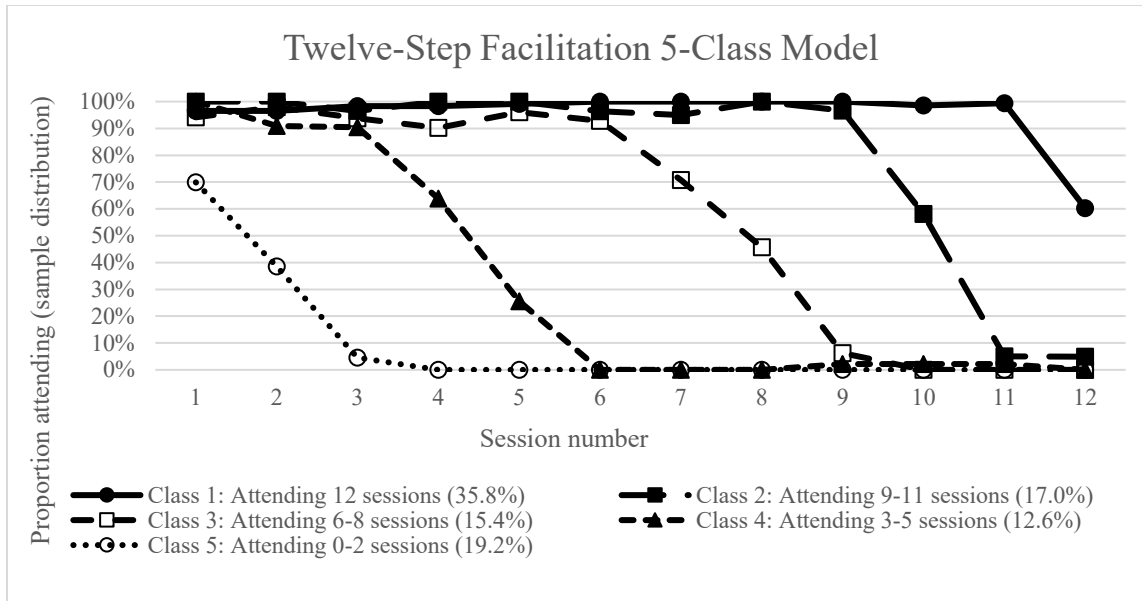

Supplemental Figure 2.

*Model Retained as the Optimal Solution from Latent Class Analyses of Attendance in Twelve-Step Facilitation*

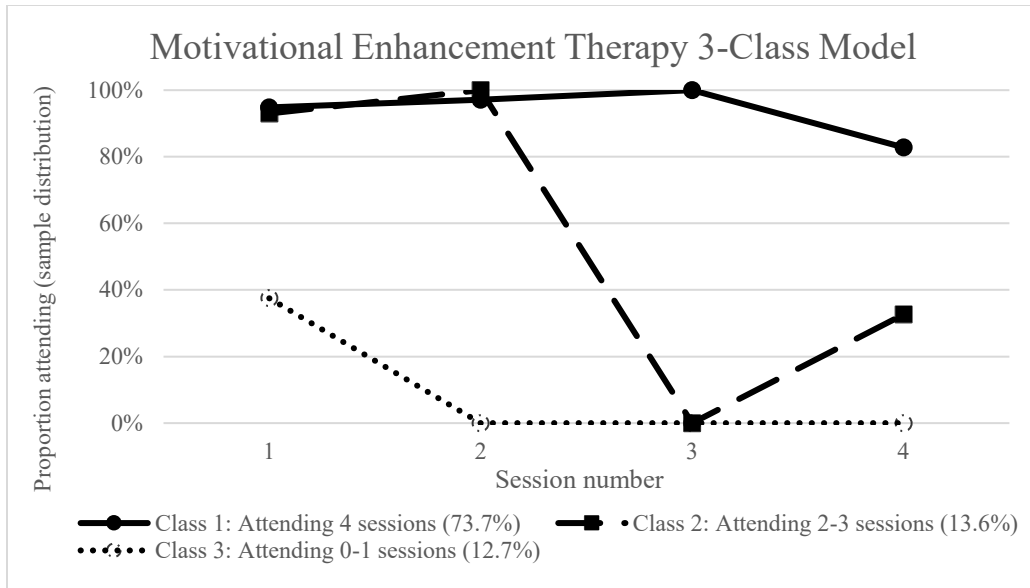

Supplemental Figure 3.

*Model Retained as the Optimal Solution from Latent Class Analyses of Attendance in Motivational Enhancement Therapy*

Supplemental Table 2.

*Frequencies and Means (Standard Errors) of Predictors of Latent Classes of Cognitive-Behavioral Therapy Attendance*

| Baseline predictors (sample size out of $n = 301$ in 3-year follow up sample) | Class 1:<br>Attending 12<br>sessions<br>( $n = 126$ ) | Class 2:<br>Attending 9-11<br>sessions<br>( $n = 50$ ) | Class 3:<br>Attending 6-8<br>sessions<br>( $n = 44$ ) | Class 4:<br>Attending 3-5<br>sessions<br>( $n = 36$ ) | Class 5:<br>Attending 0-2<br>sessions<br>( $n = 45$ ) |
|-------------------------------------------------------------------------------|-------------------------------------------------------|--------------------------------------------------------|-------------------------------------------------------|-------------------------------------------------------|-------------------------------------------------------|
| Age in years ( $n = 301$ )                                                    | 39.46 (1.50) <sup>a</sup>                             | 39.49 (3.25) <sup>a</sup>                              | 39.22 (2.18) <sup>a</sup>                             | 38.84 (2.23) <sup>a</sup>                             | 36.18 (2.24) <sup>a</sup>                             |
| Sex – % male ( $n = 301$ )                                                    | 72.7% <sup>a</sup>                                    | 61.9% <sup>a</sup>                                     | 78.2% <sup>ab</sup>                                   | 86.8% <sup>b</sup>                                    | 65.8% <sup>c</sup>                                    |
| Race – % White ( $n = 301$ )                                                  | 81.0% <sup>a</sup>                                    | 80.1% <sup>a</sup>                                     | 81.9% <sup>a</sup>                                    | 77.9% <sup>a</sup>                                    | 68.7% <sup>a</sup>                                    |
| Marital status – % married ( $n = 299$ )                                      | 44.9% <sup>ab</sup>                                   | 42.1% <sup>ab</sup>                                    | 28.9% <sup>a</sup>                                    | 46.5% <sup>b</sup>                                    | 37.2% <sup>ab</sup>                                   |
| # prior treatment episodes ( $n = 299$ )                                      | 0.81 (0.16) <sup>a</sup>                              | 0.84 (0.13) <sup>a</sup>                               | 0.96 (0.18) <sup>a</sup>                              | 1.00 (0.22) <sup>ab</sup>                             | 1.58 (0.25) <sup>b</sup>                              |
| Social support for drinking (IPA, $n = 295$ )                                 | 6.31 (0.08) <sup>a</sup>                              | 6.28 (0.19) <sup>a</sup>                               | 5.91 (0.17) <sup>a</sup>                              | 6.11 (0.28) <sup>a</sup>                              | 6.30 (0.18) <sup>a</sup>                              |
| Alcohol dependence (ADS, $n = 296$ )                                          | 13.92 (0.59) <sup>a</sup>                             | 15.18 (0.33) <sup>b</sup>                              | 14.82 (1.36) <sup>ab</sup>                            | 15.08 (1.66) <sup>ab</sup>                            | 16.06 (1.83) <sup>ab</sup>                            |
| Readiness to change (URICA, $n = 289$ )                                       | 10.17 (0.17) <sup>a</sup>                             | 10.79 (0.09) <sup>b</sup>                              | 10.39 (0.27) <sup>ab</sup>                            | 10.67 (0.20) <sup>b</sup>                             | 10.40 (0.32) <sup>ab</sup>                            |
| AA Involvement (AAI, $n = 276$ )                                              | 3.04 (0.14) <sup>a</sup>                              | 3.64 (0.23) <sup>b</sup>                               | 3.49 (0.47) <sup>ab</sup>                             | 2.82 (0.43) <sup>ab</sup>                             | 4.11 (0.71) <sup>ab</sup>                             |
| % of days attending AA meetings ( $n = 301$ )                                 | 1.6% <sup>ab</sup>                                    | 5.1% <sup>a</sup>                                      | 4.2% <sup>ab</sup>                                    | 0.9% <sup>b</sup>                                     | 5.7% <sup>ab</sup>                                    |
| Self-efficacy (AASE, $n = 297$ )                                              | 2.94 (0.10) <sup>a</sup>                              | 2.92 (0.11) <sup>a</sup>                               | 3.11 (0.12) <sup>b</sup>                              | 3.02 (0.26) <sup>abc</sup>                            | 2.58 (0.12) <sup>c</sup>                              |

*Notes.* Superscripts indicate significant differences at  $p < .05$ . Classes with shared superscripts are not significantly different from one another.

AAI = Alcoholics Anonymous Involvement Scale; AASE = Alcohol Abstinence Self-Efficacy Scale; ADS = Alcohol Dependence Scale; IPA = Important People and Activities; URICA = University of Rhode Island Change Assessment

Supplemental Table 3.

*Frequencies and Means (Standard Errors) of Predictors of Latent Classes of Twelve-Step Facilitation Attendance*

| Baseline predictors (sample size out of $n = 335$ in 3-year follow up sample) | Class 1:<br>Attending 12<br>sessions<br>( $n = 115$ ) | Class 2:<br>Attending 9-11<br>sessions<br>( $n = 55$ ) | Class 3:<br>Attending 6-8<br>sessions<br>( $n = 50$ ) | Class 4:<br>Attending 3-5<br>sessions<br>( $n = 45$ ) | Class 5:<br>Attending 0-2<br>sessions<br>( $n = 70$ ) |
|-------------------------------------------------------------------------------|-------------------------------------------------------|--------------------------------------------------------|-------------------------------------------------------|-------------------------------------------------------|-------------------------------------------------------|
| Age in years ( $n = 335$ )                                                    | 42.40 (1.58) <sup>a</sup>                             | 38.96 (2.96) <sup>ac</sup>                             | 39.22 (1.54) <sup>abc</sup>                           | 36.33 (3.43) <sup>bc</sup>                            | 36.64 (2.47) <sup>c</sup>                             |
| Sex – % male ( $n = 335$ )                                                    | 71.3% <sup>a</sup>                                    | 69.1% <sup>a</sup>                                     | 74.1% <sup>a</sup>                                    | 61.2% <sup>a</sup>                                    | 73.1% <sup>a</sup>                                    |
| Race – % White ( $n = 335$ )                                                  | 85.3% <sup>a</sup>                                    | 78.1% <sup>ab</sup>                                    | 80.1% <sup>ab</sup>                                   | 80.0% <sup>a</sup>                                    | 72.7% <sup>b</sup>                                    |
| Marital status – % married ( $n = 335$ )                                      | 52.3% <sup>ac</sup>                                   | 39.8% <sup>b</sup>                                     | 40.0% <sup>c</sup>                                    | 55.6% <sup>a</sup>                                    | 30.9% <sup>b</sup>                                    |
| # prior treatment episodes ( $n = 332$ )                                      | 1.03 (0.11) <sup>ab</sup>                             | 0.70 (0.15) <sup>a</sup>                               | 0.96 (0.15) <sup>ab</sup>                             | 1.05 (0.34) <sup>ab</sup>                             | 1.03 (0.24) <sup>b</sup>                              |
| Social support for drinking (IPA, $n = 325$ )                                 | 6.21 (0.07) <sup>ab</sup>                             | 6.14 (0.12) <sup>a</sup>                               | 6.20 (0.13) <sup>ab</sup>                             | 6.20 (0.23) <sup>ab</sup>                             | 6.34 (0.08) <sup>b</sup>                              |
| Alcohol dependence (ADS, $n = 332$ )                                          | 14.45 (0.60) <sup>ab</sup>                            | 13.81 (0.46) <sup>a</sup>                              | 15.26 (0.81) <sup>ab</sup>                            | 16.47 (2.73) <sup>ab</sup>                            | 15.55 (0.93) <sup>b</sup>                             |
| Readiness to change (URICA, $n = 321$ )                                       | 10.41 (0.24) <sup>a</sup>                             | 10.62 (0.19) <sup>a</sup>                              | 10.47 (0.42) <sup>a</sup>                             | 10.96 (0.30) <sup>a</sup>                             | 10.39 (0.22) <sup>a</sup>                             |
| AA Involvement (AAI, $n = 313$ )                                              | 3.45 (0.39) <sup>a</sup>                              | 2.53 (0.24) <sup>b</sup>                               | 3.74 (0.10) <sup>a</sup>                              | 3.62 (0.34) <sup>a</sup>                              | 3.27 (0.33) <sup>a</sup>                              |
| % of days attending AA meetings ( $n = 335$ )                                 | 3.1% <sup>ab</sup>                                    | 1.1% <sup>a</sup>                                      | 4.0% <sup>ab</sup>                                    | 2.6% <sup>ab</sup>                                    | 2.5% <sup>b</sup>                                     |
| Self-efficacy (AASE, $n = 320$ )                                              | 2.92 (0.08) <sup>a</sup>                              | 3.20 (0.11) <sup>b</sup>                               | 2.74 (0.14) <sup>a</sup>                              | 2.92 (0.15) <sup>ab</sup>                             | 2.87 (0.16) <sup>ab</sup>                             |

*Notes.* Superscripts indicate significant differences at  $p < .05$ . Classes with shared superscripts are not significantly different from one another.

AAI = Alcoholics Anonymous Involvement Scale; AASE = Alcohol Abstinence Self-Efficacy Scale; ADS = Alcohol Dependence Scale; IPA = Important People and Activities; URICA = University of Rhode Island Change Assessment

Supplemental Table 4.

*Frequencies and Means (Standard Errors) of Predictors of Latent Classes of Motivational Enhancement Therapy Attendance*

| Baseline predictors (sample size out of $n = 316$<br>in 3-year follow up sample) | Class 1:                              | Class 2:                               | Class 3:                               |
|----------------------------------------------------------------------------------|---------------------------------------|----------------------------------------|----------------------------------------|
|                                                                                  | Attending 4 sessions<br>( $n = 233$ ) | Attending 2-3 sessions<br>( $n = 43$ ) | Attending 0-1 sessions<br>( $n = 40$ ) |
| Age in years ( $n = 316$ )                                                       | 38.39 (2.06) <sup>a</sup>             | 39.49 (2.39) <sup>a</sup>              | 37.35 (2.10) <sup>a</sup>              |
| Sex – % male ( $n = 316$ )                                                       | 74.7% <sup>ab</sup>                   | 81.4% <sup>a</sup>                     | 65.0% <sup>b</sup>                     |
| Race – % White ( $n = 316$ )                                                     | 81.5% <sup>a</sup>                    | 79.1% <sup>a</sup>                     | 80.0% <sup>a</sup>                     |
| Marital status – % married ( $n = 316$ )                                         | 47.6% <sup>a</sup>                    | 41.9% <sup>a</sup>                     | 35.0% <sup>a</sup>                     |
| # prior treatment episodes ( $n = 316$ )                                         | 0.97 (0.07) <sup>a</sup>              | 1.16 (0.11) <sup>b</sup>               | 0.85 (0.11) <sup>c</sup>               |
| Social support for drinking (IPA, $n = 305$ )                                    | 6.21 (0.07) <sup>ab</sup>             | 6.07 (0.07) <sup>a</sup>               | 6.32 (0.10) <sup>b</sup>               |
| Alcohol dependence (ADS, $n = 314$ )                                             | 14.47 (0.29) <sup>a</sup>             | 15.01 (1.24) <sup>a</sup>              | 14.61 (1.19) <sup>a</sup>              |
| Readiness to change (URICA, $n = 301$ )                                          | 10.59 (0.10) <sup>a</sup>             | 10.60 (0.28) <sup>a</sup>              | 10.61 (0.25) <sup>a</sup>              |
| AA Involvement (AAI, $n = 294$ )                                                 | 3.50 (0.16) <sup>a</sup>              | 3.81 (0.20) <sup>a</sup>               | 3.08 (0.39) <sup>a</sup>               |
| % of days attending AA meetings ( $n = 316$ )                                    | 2.7% <sup>a</sup>                     | 5.0% <sup>a</sup>                      | 3.1% <sup>a</sup>                      |
| Self-efficacy (AASE, $n = 307$ )                                                 | 3.00 (0.04) <sup>a</sup>              | 2.89 (0.15) <sup>a</sup>               | 2.97 (0.09) <sup>a</sup>               |

*Notes.* Superscripts indicate significant differences at  $p < .05$ . Classes with shared superscripts are not significantly different from one another.

AAI = Alcoholics Anonymous Involvement Scale; AASE = Alcohol Abstinence Self-Efficacy Scale; ADS = Alcohol Dependence Scale; IPA = Important People and Activities; URICA = University of Rhode Island Change Assessment
